# Supplementary material for: Normal Non-HDL Cholesterol, Low Total Cholesterol, and HDL Cholesterol Levels in Sickle Cell Disease Patients in the Steady State: A Case-Control Study of Tema Metropolis
Source: Hindawi journal article supplement (doi:10.1155/2016/7650530), 2016-01-01
Supplement: f1 [file 7650530.f1.pdf]

Supplementary Data S1

Correlation of Age, BMI, and Blood pressure variables to serum lipid profile among sickle cell disease (Upper portion) and healthy individuals (Lower Portion).

| <b>Parameter</b> |         | <b>AGE</b> | <b>BMI</b> | <b>SBP</b> | <b>DBP</b> | <b>TC</b> | <b>TG</b> | <b>LDL</b> | <b>VLDL</b> | <b>HDL</b> | <b>Non-HDL</b> | <b>TG/HDL</b> |
|------------------|---------|------------|------------|------------|------------|-----------|-----------|------------|-------------|------------|----------------|---------------|
| <b>AGE</b>       | R       | 1          | -0.072     | 0.225      | -0.028     | 0.002     | -0.083    | -0.085     | 0.078       | 0.251      | -0.125         | -0.184        |
|                  | P-value |            | 0.621      | 0.117      | 0.848      | 0.991     | 0.565     | 0.556      | 0.591       | 0.078      | 0.385          | 0.201         |
| <b>BMI</b>       | R       | -0.132     | 1          | -0.145     | -0.153     | -0.218    | -0.155    | -0.256     | -0.185      | 0.150      | -.353*         | -0.175        |
|                  | P-value | 0.360      |            | 0.315      | 0.288      | 0.128     | 0.283     | 0.073      | 0.197       | 0.300      | 0.012          | 0.225         |
| <b>SBP</b>       | R       | -0.090     | 0.138      | 1          | .719**     | 0.186     | -0.074    | 0.150      | -0.147      | 0.199      | 0.156          | -0.04         |
|                  | P-value | 0.532      | 0.34       |            | 0.000      | 0.196     | 0.61      | 0.300      | 0.309       | 0.166      | 0.279          | 0.782         |
| <b>DBP</b>       | R       | 0.009      | 0.112      | 0.056      | 1          | 0.114     | 0.096     | 0.103      | 0.12        | -0.029     | 0.186          | 0.157         |
|                  | P-value | 0.951      | 0.439      | 0.697      |            | 0.429     | 0.507     | 0.475      | 0.408       | 0.842      | 0.196          | 0.276         |
| <b>TC</b>        | R       | 0.196      | -0.257     | 0.055      | 0.009      | 1         | 0.075     | .871**     | -0.099      | .496**     | .875**         | -0.059        |
|                  | P-value | 0.173      | 0.071      | 0.706      | 0.949      |           | 0.604     | 0.000      | 0.495       | 0.000      | 0.000          | 0.684         |
| <b>TG</b>        | R       | 0.108      | -0.187     | 0.161      | 0.005      | .404**    | 1         | -0.243     | .364**      | -0.227     | 0.213          | .711**        |
|                  | P-value | 0.454      | 0.193      | 0.264      | 0.975      | 0.004     |           | 0.09       | 0.009       | 0.113      | 0.138          | 0.000         |
| <b>LDL</b>       | R       | 0.117      | 0.006      | -0.019     | 0.067      | -0.138    | 0.004     | 1          | -0.186      | 0.22       | .865**         | -0.134        |
|                  | P-value | 0.417      | 0.966      | 0.897      | 0.642      | 0.341     | 0.978     |            | 0.197       | 0.125      | 0.000          | 0.354         |
| <b>VLDL</b>      | R       | 0.110      | -0.193     | 0.159      | -0.004     | .407**    | .999**    | 0          | 1           | -0.181     | -0.028         | .300*         |
|                  | P-value | 0.445      | 0.179      | 0.271      | 0.98       | 0.003     | 0         | 0.998      |             | 0.209      | 0.846          | 0.034         |
| <b>HDL</b>       | R       | -0.013     | -0.127     | 0.126      | 0.001      | 0.156     | 0.005     | -0.044     | 0.001       | 1          | 0.096          | -.508**       |
|                  | P-value | 0.930      | 0.379      | 0.382      | 0.993      | 0.279     | 0.974     | 0.763      | 0.996       |            | 0.506          | 0.000         |
| <b>Non-HDL</b>   | R       | 0.153      | -0.18      | 0.001      | -0.025     | .899**    | .386**    | -0.101     | .391**      | -0.258     | 1              | 0.174         |
|                  | P-value | 0.288      | 0.212      | 0.995      | 0.864      | 0.000     | 0.006     | 0.485      | 0.005       | 0.07       |                | 0.228         |
| <b>TG/HDL</b>    | R       | 0.053      | -0.04      | 0.141      | 0.082      | 0.163     | .791**    | -0.001     | .792**      | -.543**    | .378**         | 1             |
|                  | P-value | 0.715      | 0.781      | 0.328      | 0.571      | 0.258     | 0.000     | 0.997      | 0.000       | 0.000      | 0.007          |               |
